# Supplementary material
Source: PubMed Central journal article supplement (PMC1326049)
Supplement: plntphys_pp.105.071167_1.pdf [file plntphys_pp.105.071167_1.pdf]

**Supplementary Figure 1.**

Delayed down-regulated gene expression in SnRK1-antisense and wildtype embryos of pea.

Delayed down-regulated genes in Vic-34 embryos have been classified into functional groups (see text for details). Vic-34, red line; wildtype, dark blue line, all the genes of the respective group are shown in gray.

**Supplementary Figure 2.**

Delayed up-regulated gene expression SnRK1-antisense and wildtype embryos of pea.

Delayed up-regulated genes in Vic-34 embryos have been classified into functional groups (see text for details). Vic-34, red line; wildtype, dark blue line, all the genes of the respective group are shown in gray.
